# Supplementary material
Source: MDPI journal article supplement (https://www.mdpi.com/2073-4441/12/3/720)
Supplement: s1 [file s1]

**Supplementary Table S1:** Summary of General Linear Mixed Models (LMMs) for Non Rainfall Water Inputs (NRWI) during dry, wet soil periods and for the total study period, as a function of cover type (well developed cyanobacterial crusts and bare soil), and NRWI event.

|                             | Dry period |         | Wet Period |         | Total Study Period |         |
|-----------------------------|------------|---------|------------|---------|--------------------|---------|
|                             | F          | p Value | F          | p Value | F                  | p Value |
| Cover type (Fixed)          | 21.70      | 0.00    | 297.47     | 0.00    | 180.47             | 0.00    |
| NRWI event (Random)         | 9.93       | 0.00    | 62.01      | 0.00    | 21.72              | 0.00    |
| Cover * NRWI event (Random) | 1.62       | 0.15    | 0.14       | 1.00    | 0.28               | 1.00    |

**Supplementary Table S2:** Summary of General Linear Mixed Models (LMMs) for soil moisture decrease rate, as a function of cover type (well developed cyanobacterial crusts and bare soil), and drying event at the two study sites (El Cautivo and Las Amoladeras).

|                               | El Cautivo |         | Las Amoladeras |         |
|-------------------------------|------------|---------|----------------|---------|
|                               | F          | p Value | F              | p Value |
| Cover type (Fixed)            | 20.26      | 0.00    | 4.79           | 0.09    |
| Drying event (Random)         | 37.81      | 0.00    | 4.59           | 0.08    |
| Cover * Drying event (Random) | 0.66       | 0.70    | 0.84           | 0.51    |
